# Supplementary material for: Use of an Integrated Pan-Cancer Oncology Enrichment Next-Generation Sequencing Assay to Measure Tumour Mutational Burden and Detect Clinically Actionable Variants
Source: Springer Nature journal article supplement (doi:10.1007/s40291-020-00462-x), 2020-04-18

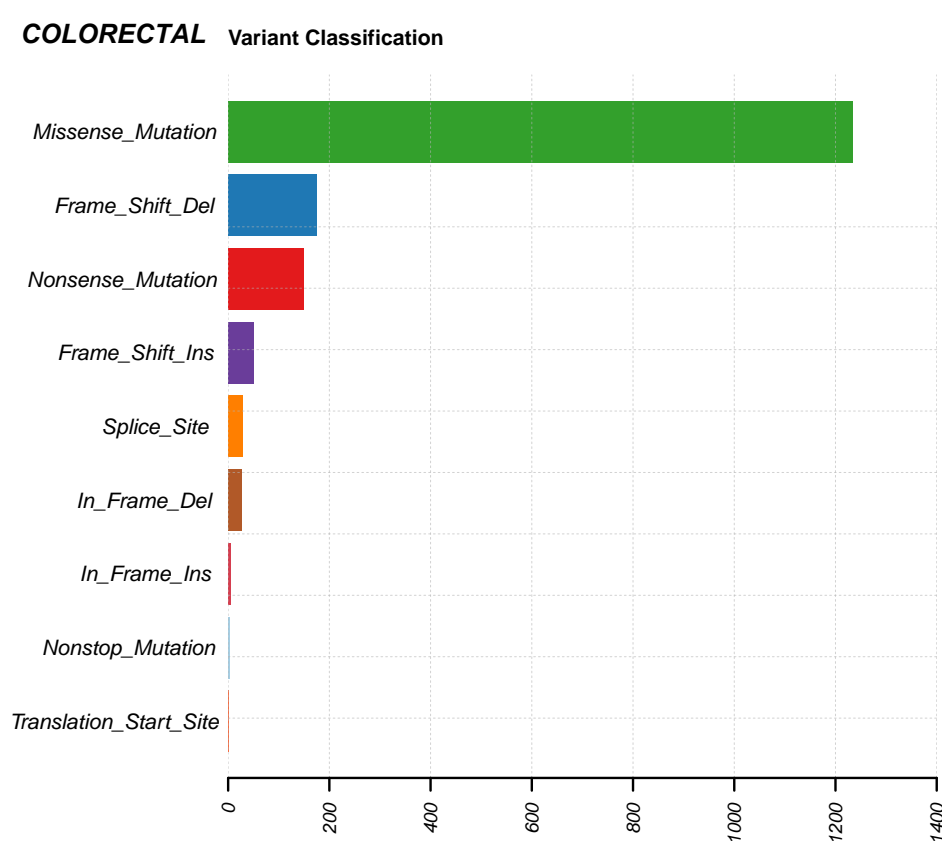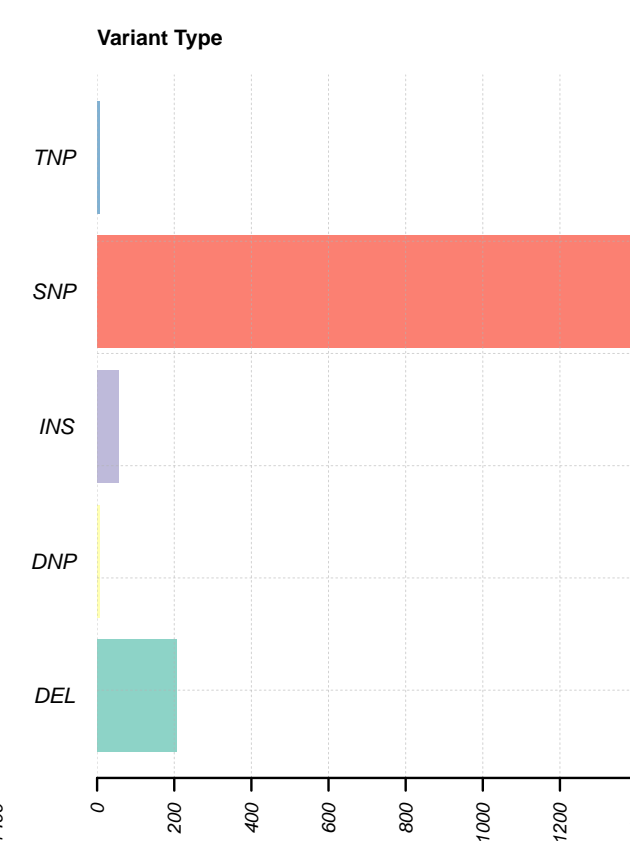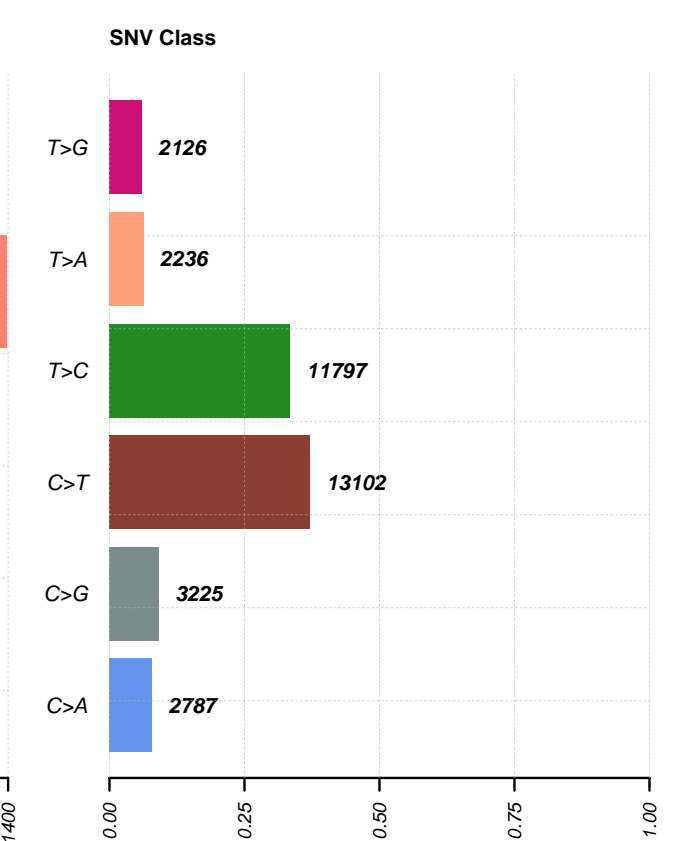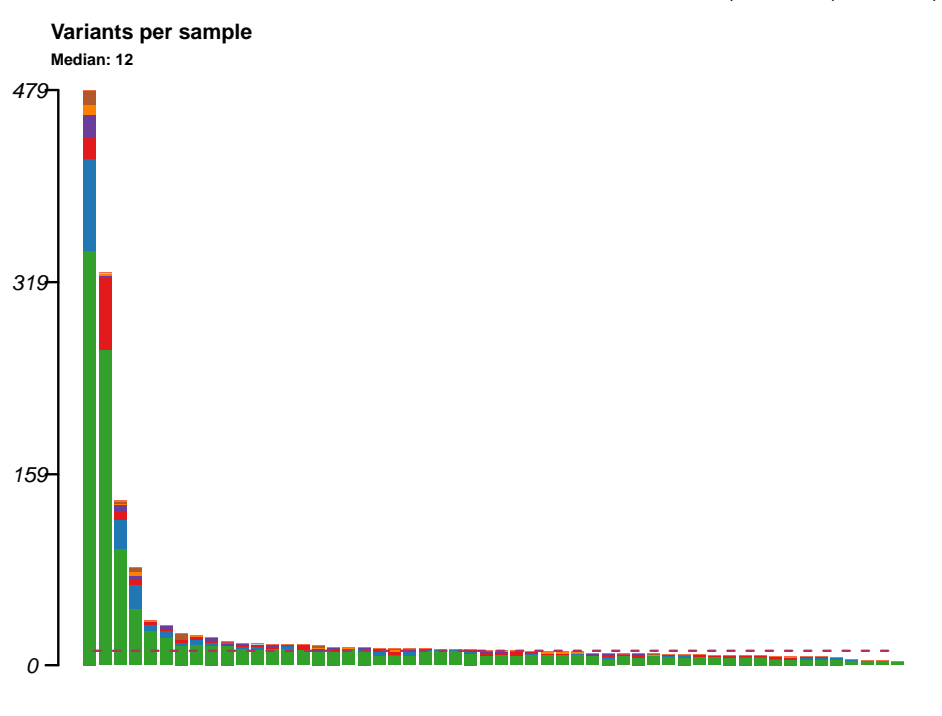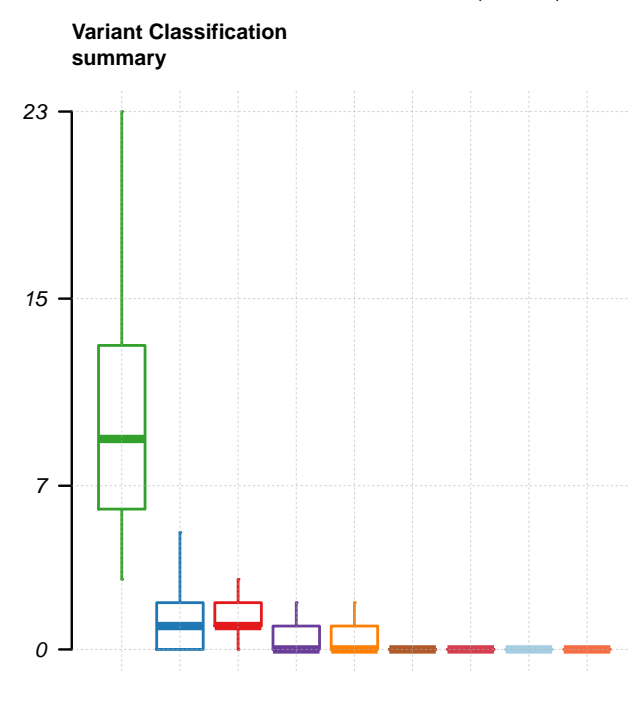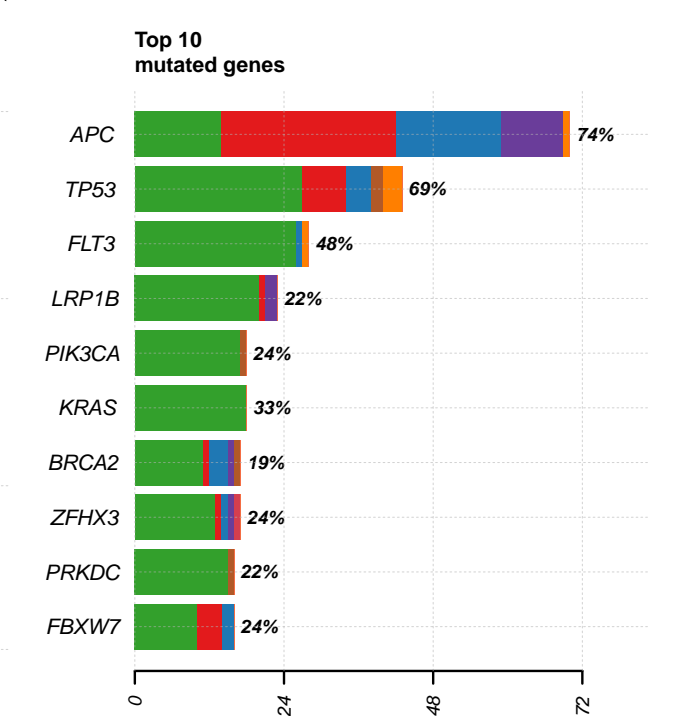

# C9GCD<5; 95 @Variant Classification

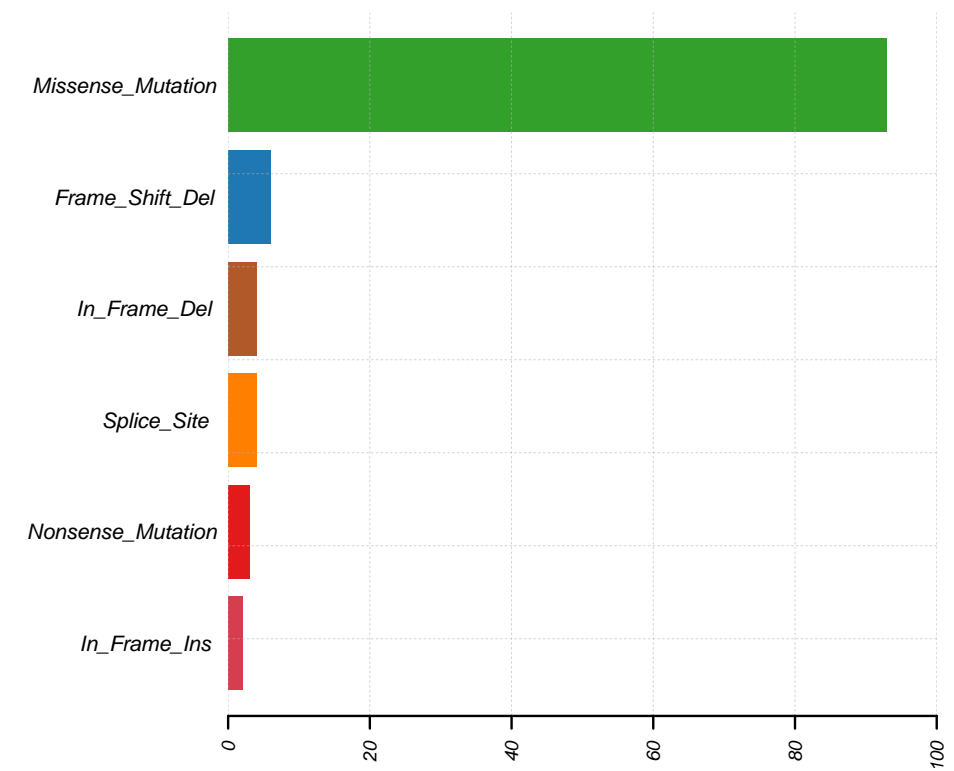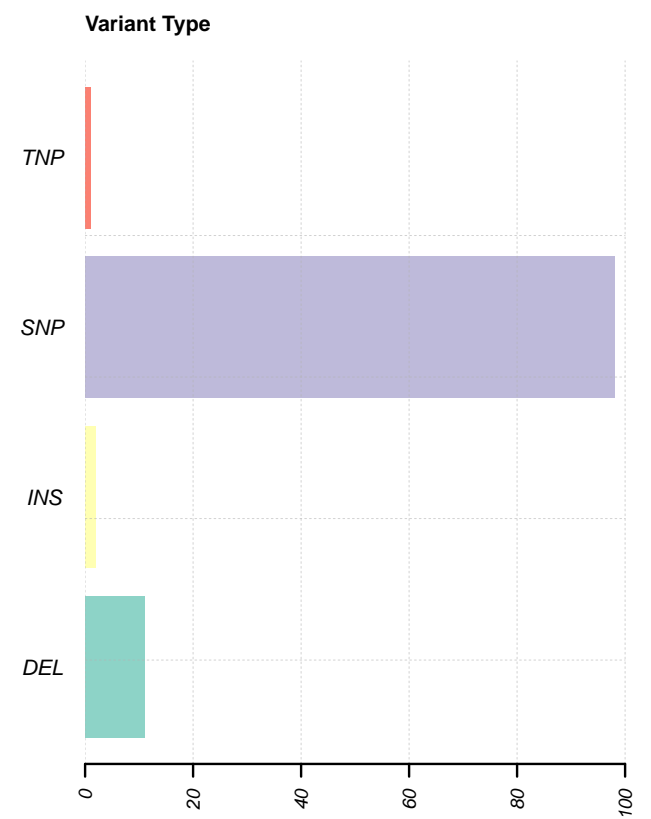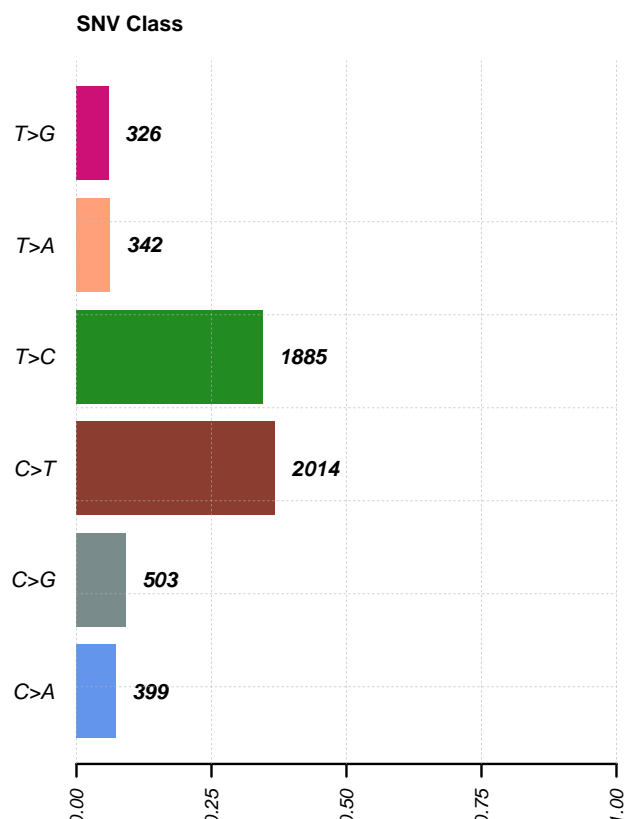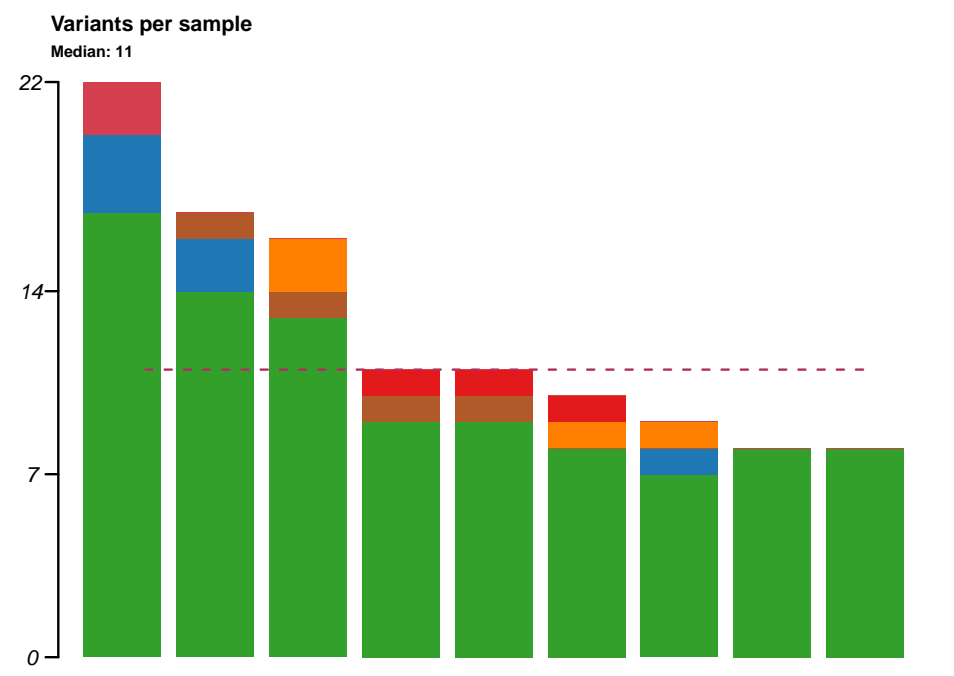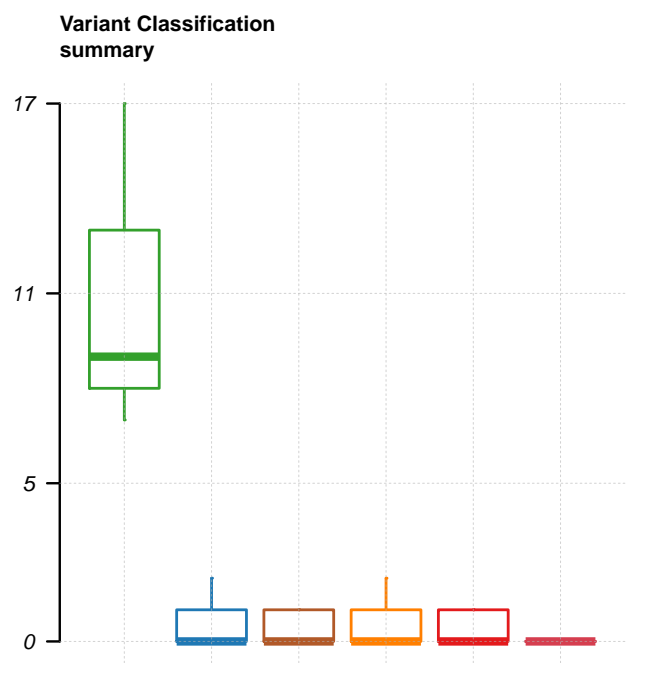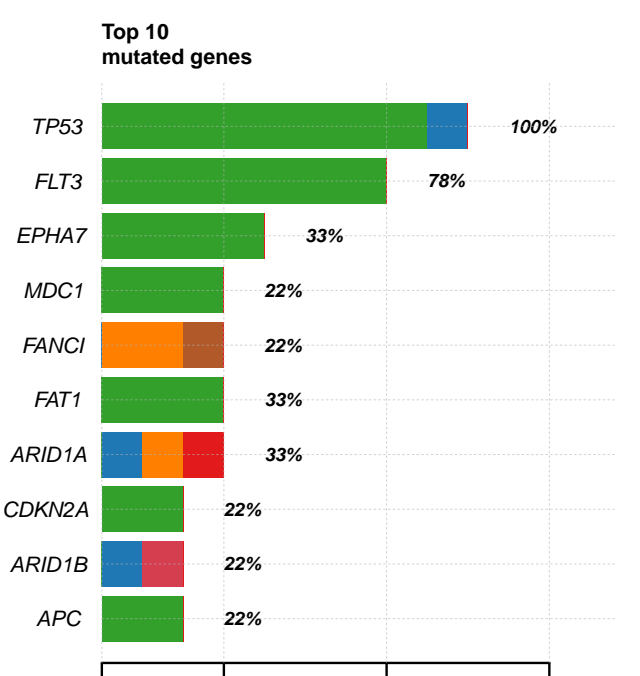

# LUNG

## Variant Classification

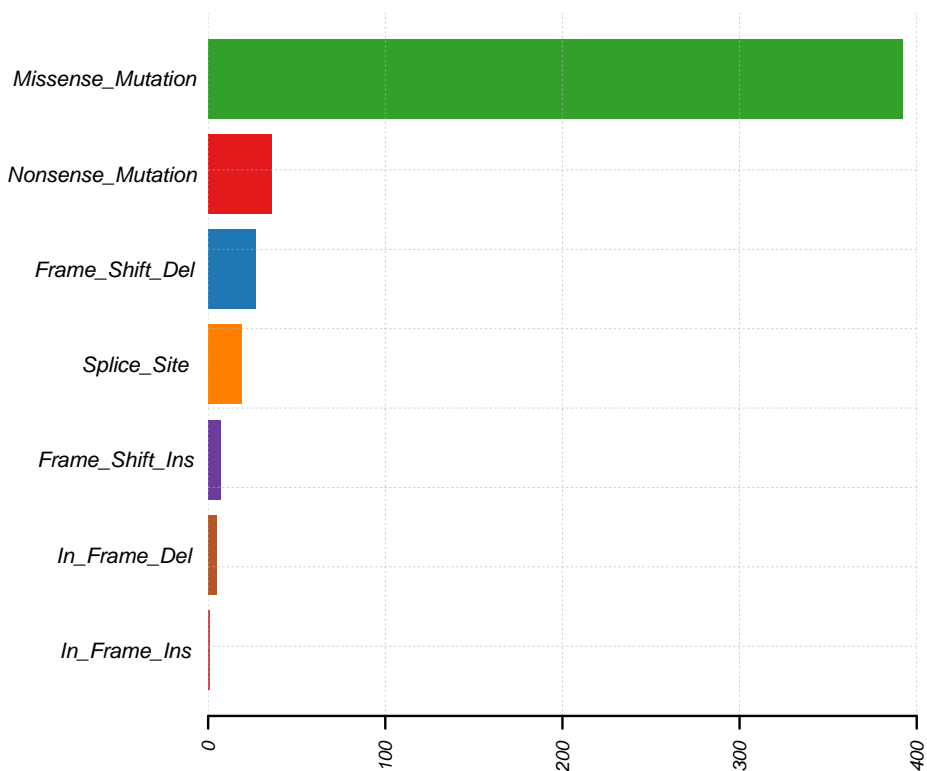

## Variant Type

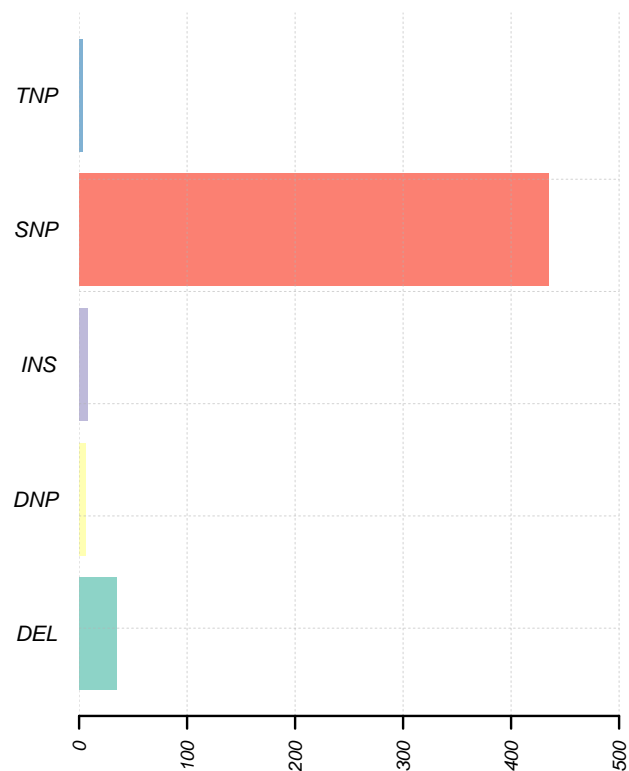

## SNV Class

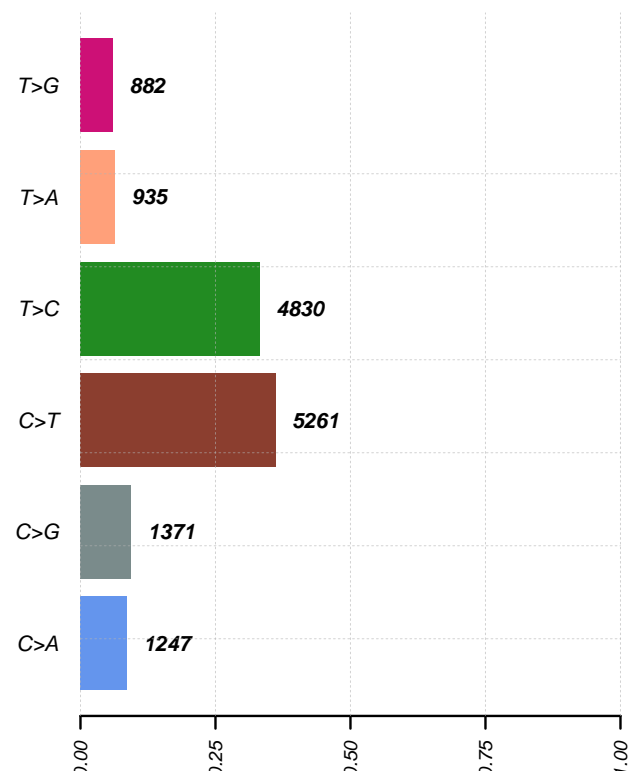

## Variants per sample

Median: 21

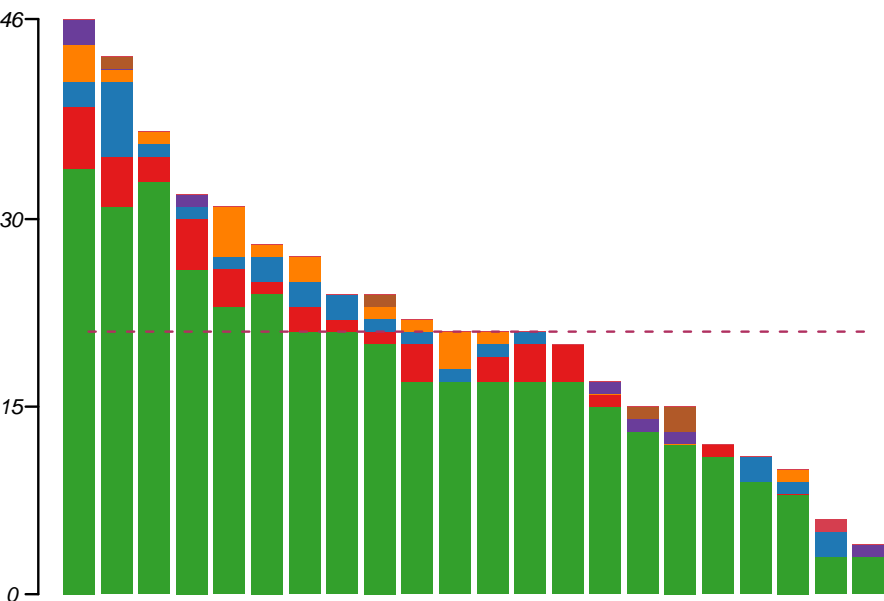

## Variant Classification summary

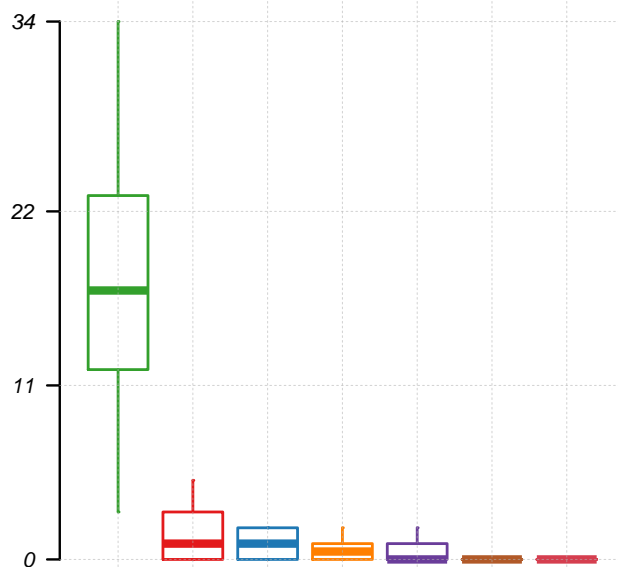

## Top 10 mutated genes

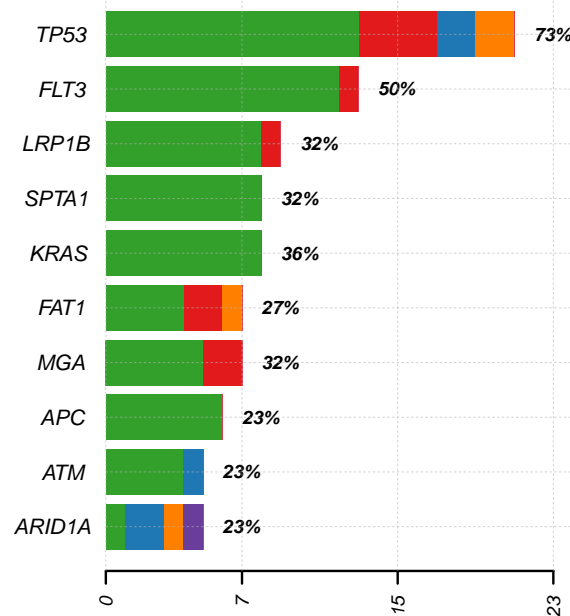

Supplement: MOESM1 [file 24437056]
